# Supplementary material for: A Titanium-Based Superhydrophobic Coating with Enhanced Antibacterial, Anticoagulant, and Anticorrosive Properties for Dental Applications
Source: MDPI journal article supplement (doi:10.3390/coatings14050571), 2024-05-05
Supplement: s1 [file s1]

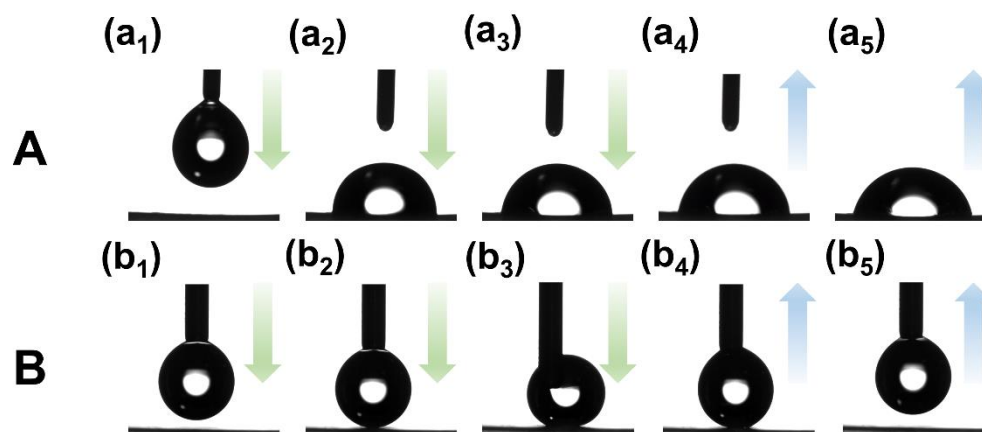

Figure S1. Dynamic behavior of water droplets (5  $\mu\text{L}$ ) in contact with different sample surfaces. Sample A (a<sub>1</sub>-a<sub>5</sub>) and Sample B (b<sub>1</sub>-b<sub>5</sub>) represent the bare Ti and SH-35 V, respectively. The direction of the arrow indicates the movement direction of the needle tip.

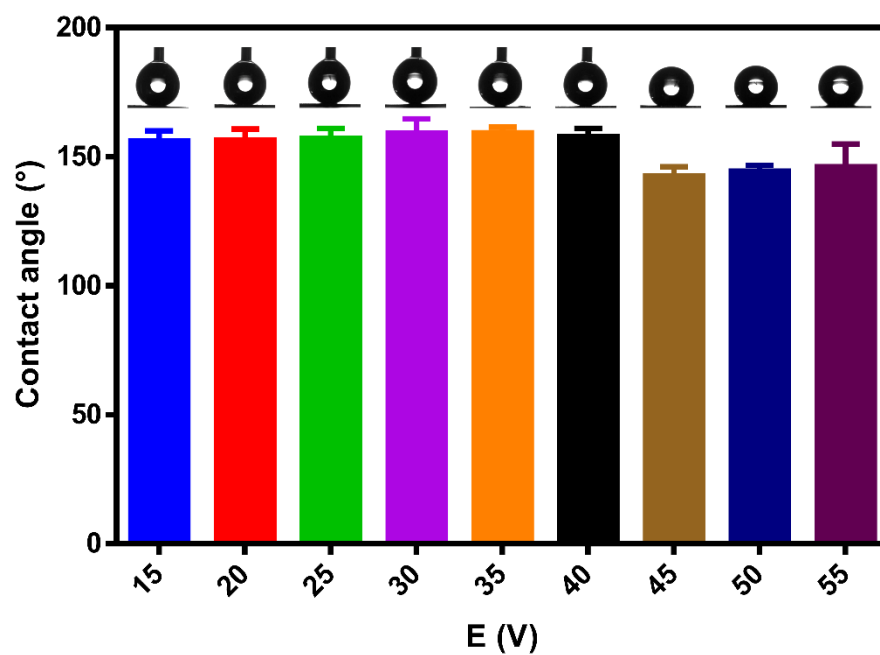

Figure S2. CA of artificial saliva via anodization at different voltages for 1 h followed by FAS modification on coatings.

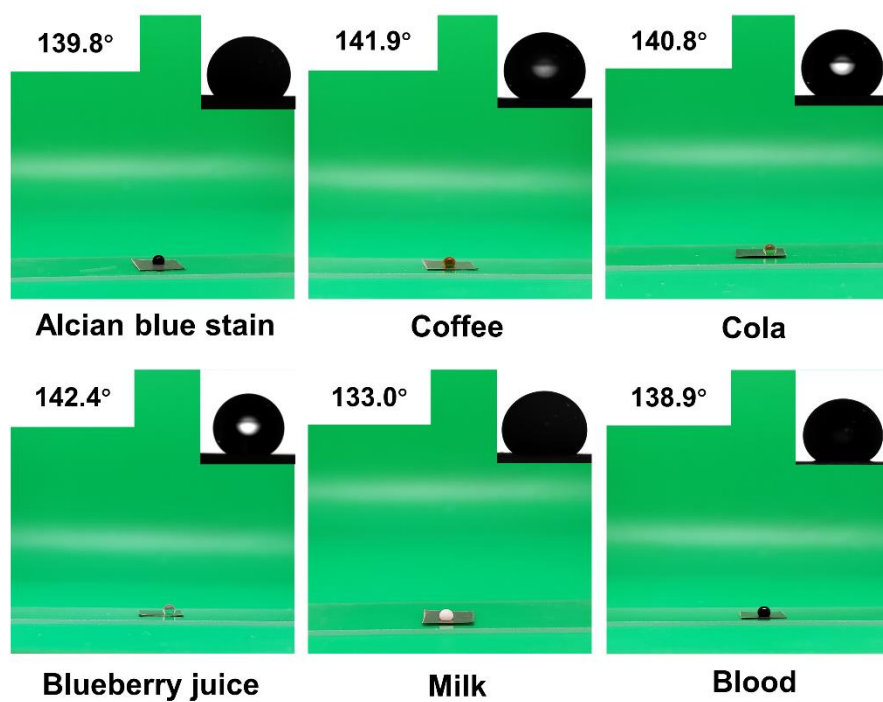

Figure S3. The hydrophobicity of different kinds of liquids (10  $\mu$ L) on SH-35 V.

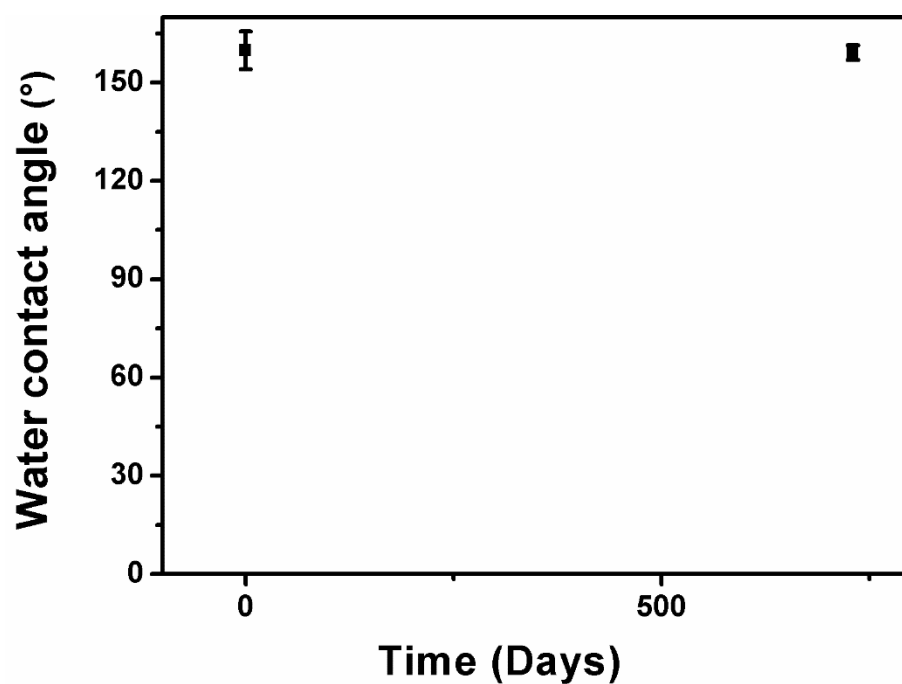

Figure S4. WCA of SH-35 V after storing at ambient temperature in air for 730 days.

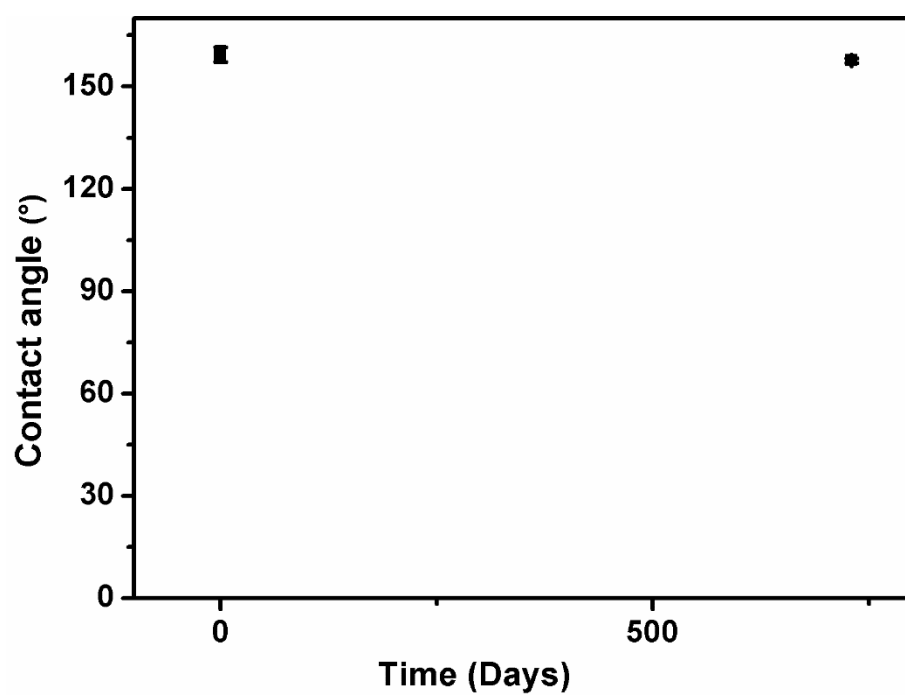

Figure S5. CA of artificial saliva on SH-35 V after storing at ambient temperature in air for 730 days.

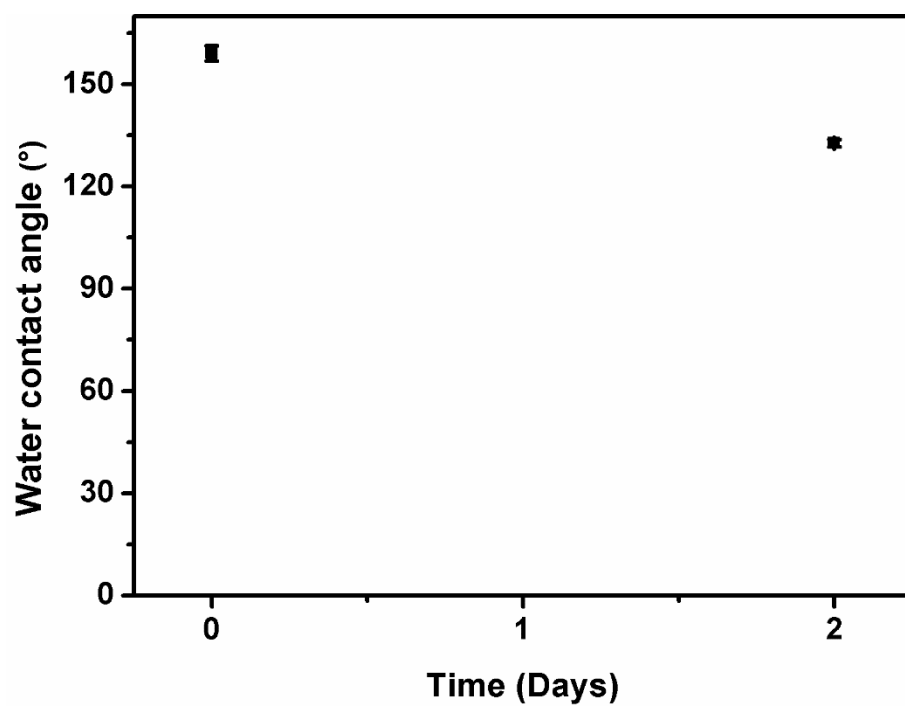

Figure S6. WCA of SH-35 V after immersion in artificial saliva for 2 days.

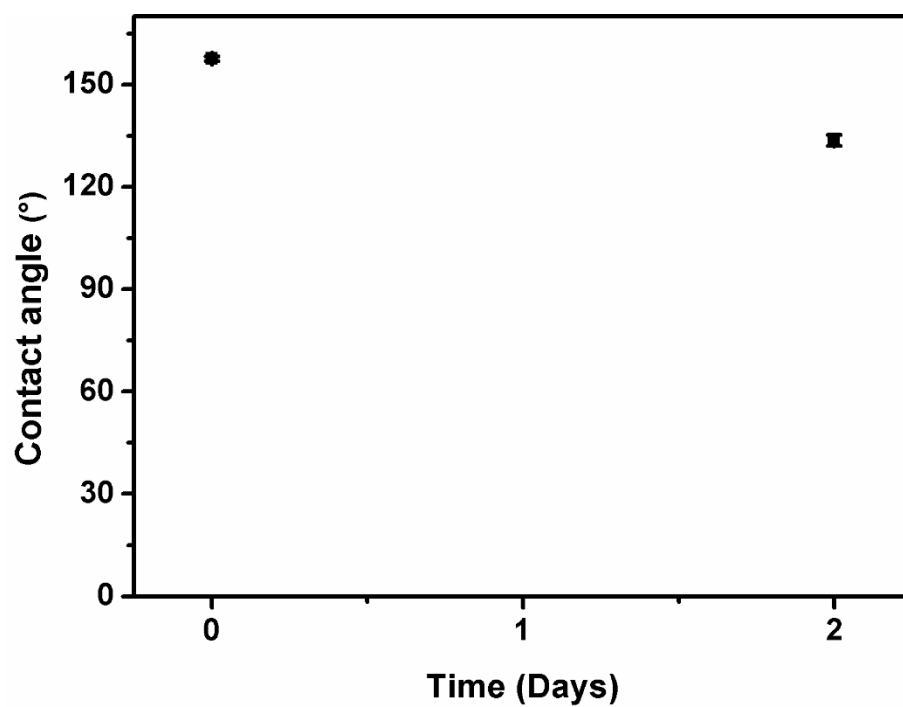

Figure S7. CA of artificial saliva on SH-35 V after immersion in artificial saliva for 2 days.

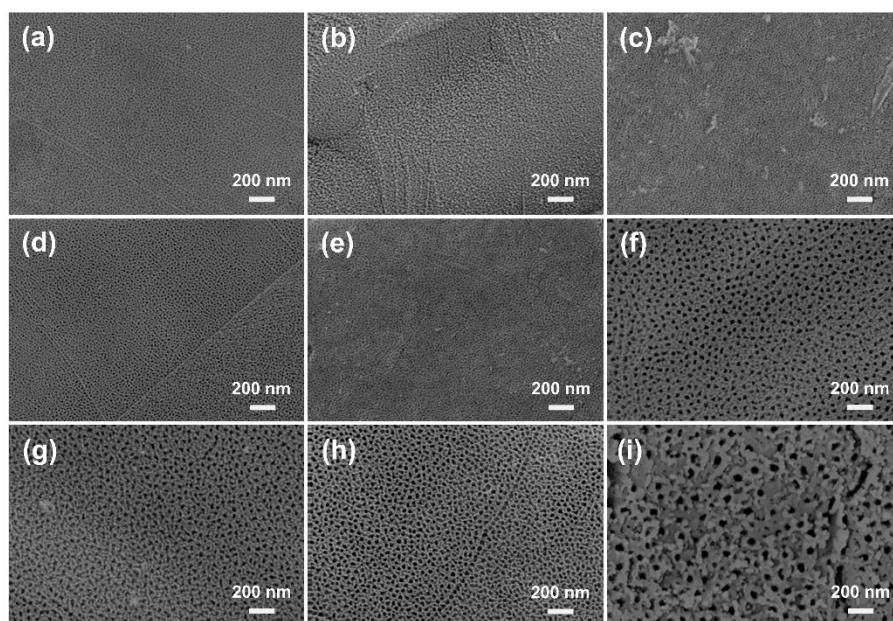

Figure S8. SEM images of anodized samples at different voltages: (a) AO-15 V, (b) AO-20 V, (c) AO-25 V, (d) AO-30 V, (e) AO-35 V, (f) AO-40 V, (g) AO-45 V, (h) AO-50 V and (i) AO-55 V.

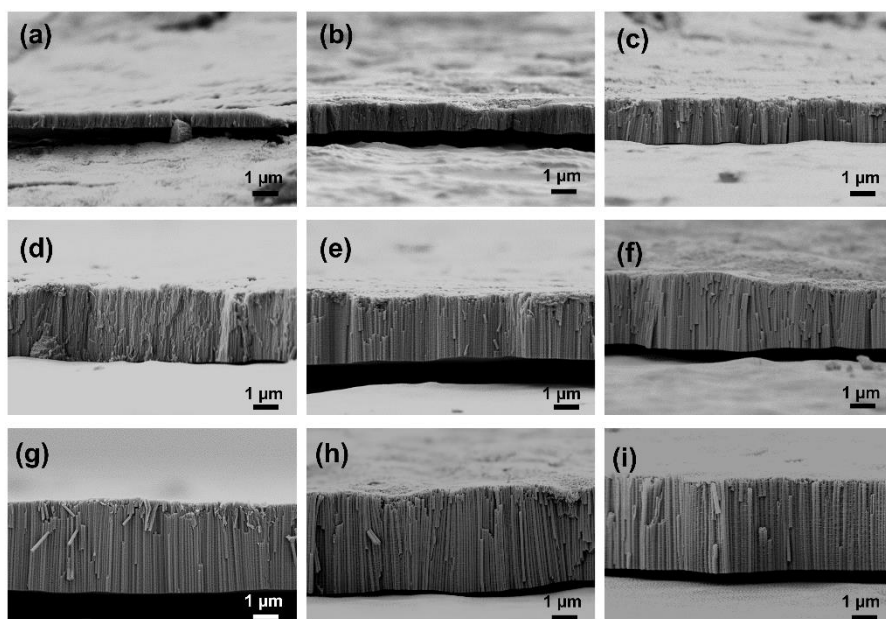

Figure S9. SEM cross-sectional images of anodized samples at different voltages: (a) AO-15 V, (b) AO-20 V, (c) AO-25 V, (d) AO-30 V, (e) AO-35 V, (f) AO-40 V, (g) AO-45 V, (h) AO-50 V and (i) AO-55 V.

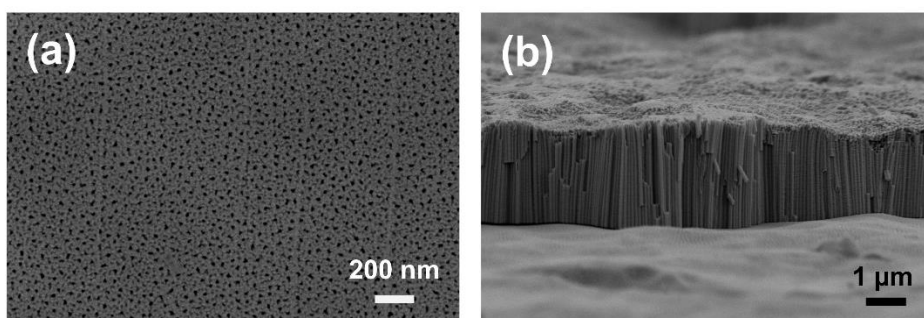

Figure S10. (a) SEM image and (b) SEM cross-sectional images of SH-35 V after immersion in artificial saliva for 2 days.

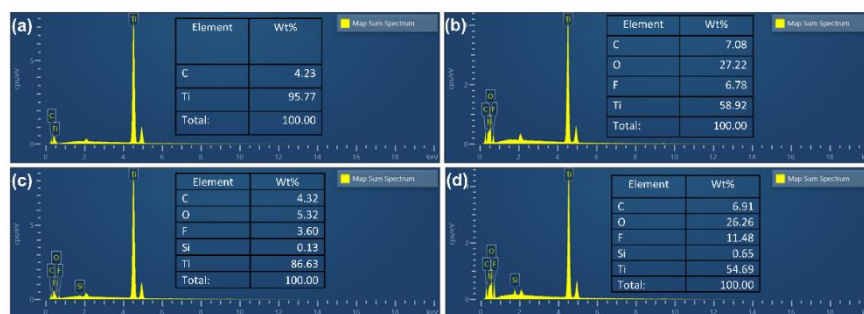

Figure S11. EDS spectra of (a) bare Ti, (b) AO-35 V, (c) Ti + FAS and (d) SH-35 V.

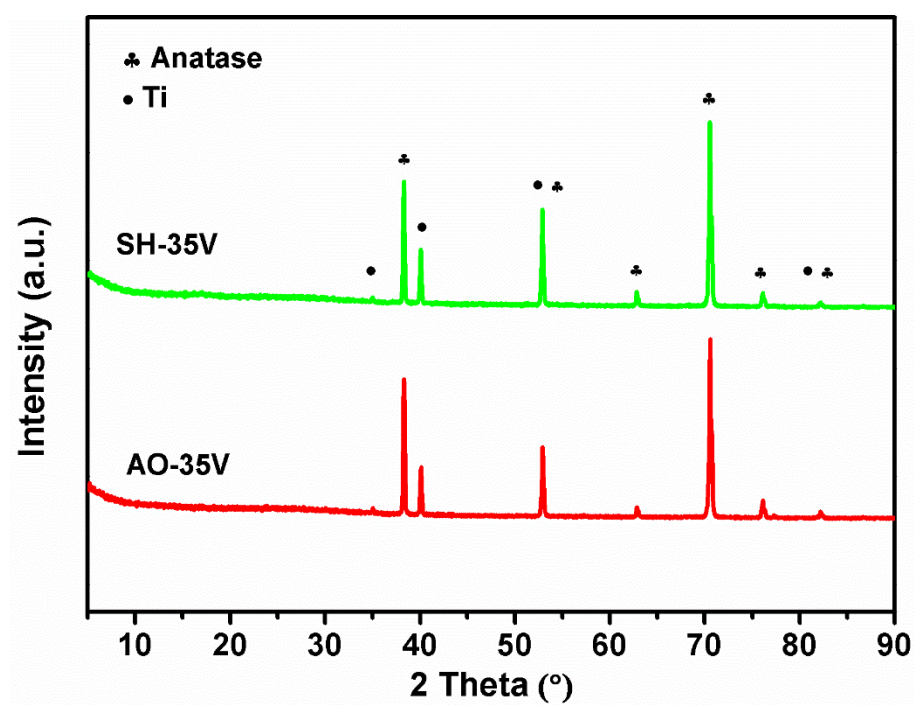

Figure S12. XRD images of AO-35 V and SH-35 V.
